# Supplementary material for: Hemozoin produced by mammals confers heme tolerance
Source: eLife. 2019 Oct 1;8:e49503. doi: 10.7554/eLife.49503 (PMC6773446; doi:10.7554/eLife.49503)
Supplement: Supplementary file 2. [file elife-49503-supp2.xlsx]

## Sheet: XFM
Element	Significant?	P value	Mean1	Mean2	Difference	SE of difference	t ratio	df	n (cells)	Figure 3
P	No	0.194346	1.172	1.399	-0.2274	0.1605	1.417	8	5
S	Yes	8.00763e-05	0.5899	1.265	-0.675	0.09186	7.348	8	5
Ca	Yes	0.0194678	0.1937	0.09915	0.09456	0.03245	2.914	8	5
Mn	No	0.321779	1.024e-14	1.129e-13	-1.027e-13	9.723e-14	1.056	8	5
Fe	Yes	0.00460138	1.031	4.622	-3.591	0.9229	3.891	8	5
Cu	Yes	0.00795169	0.003289	0.01069	-0.007404	0.002109	3.511	8	5
Zn	No	0.129227	0.08531	0.05119	0.03412	0.02017	1.691	8	5

## Sheet: qPCR_spleen
Spleen
	Gene name	Gene expression (2^(-ΔCt))				p-value			Supplemental Figure 3
		HRG1+/+ Standard	HRG1-/- Standard	HRG1+/+ 2ppm	HRG1-/- 2ppm	+/+ vs -/- Standard	+/+ vs -/- 2ppm
1	Ncoa4	0.460228	0.45156	0.677581	0.654086	0.785908	0.910494
2	Ankrd37	0.077148	0.06764	0.042022	0.078109	0.203337	0.082088
3	Smad7	0.076842	0.086016	0.021828	0.046165	0.274171	0.11449
4	Neo1	0.008445	0.00909	0.004881	0.012302	0.65851	0.001396
5	Mfsd7b	0.04416	0.040798	0.021812	0.036406	0.446136	0.056827
6	Steap3	0.009364	0.008803	0.043108	0.03235	0.683205	0.675788
7	Alas2	0.015192	0.013973	0.137159	0.114733	0.606314	0.844622
8	Steap2	0.007771	0.008065	0.003611	0.008499	0.860607	0.00879
9	Pcbp2	1.44205	1.4893	1.39647	1.43774	0.673885	0.83502
10	Slc39a8	0.008971	0.010366	0.034527	0.018045	0.338525	0.259762
11	Slc39a14	0.023129	0.022927	0.007918	0.015392	0.938729	0.086934
12	Hmox2	0.132777	0.122484	0.067796	0.112948	0.353423	0.074152
13	Slc11a2	0.07238	0.071503	0.132895	0.097686	0.856884	0.317352
14	Il12a	0.054078	0.047771	0.017265	0.040463	0.315652	0.100251
15	Heph	0.007771	0.008065	0.003892	0.010382	0.860607	0.00032
16	Fbxl5	0.424975	0.393218	0.183384	0.370833	0.223873	0.020012
17	Slc38a1	0.245817	0.22301	0.103132	0.195156	0.23564	0.054551
18	Cp	0.149606	0.123381	0.053151	0.130496	0.040584	0.050688
19	Nox4	0.007771	0.008065	0.003604	0.008499	0.860607	0.008779
20	Trfr2	0.008191	0.008065	0.015932	0.011385	0.937299	0.431137
21	Tlr7	0.070707	0.06133	0.027631	0.076642	0.329741	0.05663
22	Alas1	0.051966	0.047865	0.034113	0.051883	0.41855	0.087581
23	Aco1	0.034538	0.029939	0.027705	0.033004	0.104746	0.164952
24	Bmp6	0.008986	0.009215	0.004589	0.013405	0.867165	0.00041
25	Epo	0.007771	0.008065	0.003604	0.008499	0.860607	0.008779
26	Fech	0.073222	0.061787	0.355397	0.316257	0.257168	0.85321
27	Fxn	0.039113	0.040464	0.082965	0.055555	0.666486	0.159952
28	Ifnab	0.02035	0.013281	0.007811	0.017754	0.258808	0.110244
29	Il1b	0.032794	0.0297	0.023154	0.03559	0.623479	0.262454
30	Lcn2	0.008039	0.008065	0.020481	0.036683	0.987727	0.339753
31	Smad4	0.666844	0.634719	0.224429	0.472095	0.528873	0.081848
32	Trim27	0.44057	0.409639	0.400956	0.39193	0.363565	0.84778
33	Saa1	0.007771	0.008431	0.003604	0.008499	0.686138	0.008779
34	Stat6	0.011246	0.012675	0.00548	0.012844	0.310895	0.006443
35	Epas1	0.118297	0.122453	0.063605	0.126695	0.715891	0.085056
36	Fth1	8.27107	7.82364	12.1074	10.1259	0.550265	0.231022
37	Ftl1	3.05118	3.16773	2.43945	3.15222	0.621149	0.09736
38	Gast	0.007771	0.008065	0.003604	0.008499	0.860607	0.008779
39	Ggh	0.061242	0.069158	0.041502	0.062903	0.270486	0.142022
40	Herc2	0.323256	0.301078	0.273275	0.268044	0.354969	0.869643
41	Hfe	0.027479	0.023567	0.018634	0.036539	0.363139	0.037129
42	Hif1a	0.144096	0.12521	0.06031	0.10897	0.081934	0.156598
43	Hmox1	0.061712	0.052363	0.066466	0.150277	0.452103	0.057685
44	Id1	0.038423	0.041967	0.024664	0.045018	0.662734	0.100576
45	Ifna2	0.01001	0.009491	0.005368	0.012305	0.850758	0.041967
46	Ifna4	0.007771	0.008065	0.003759	0.008499	0.860607	0.008373
47	Ifnb1	0.008262	0.008599	0.003884	0.008853	0.852075	0.010902
48	Il10	0.007771	0.008065	0.003604	0.008846	0.860607	0.004212
49	Il1a	0.018561	0.019324	0.01921	0.024782	0.773414	0.344068
50	Nos2	0.586098	0.501664	0.31465	0.559412	0.762478	0.182222
51	Spic	0.075424	0.071478	0.066295	0.104985	0.57783	0.269443
52	Stat3	0.354791	0.341432	0.142882	0.287183	0.595846	0.099515
53	Tfrc	0.0931	0.099157	0.602722	0.2551	0.554229	0.225457
54	Pcbp1	0.682598	0.465519	0.631387	0.73657	0.308162	0.202
55	Eif2ak1	0.123477	0.111092	0.276118	0.17224	0.220474	0.209149
56	Slc11a1	0.019358	0.017986	0.014885	0.028003	0.580363	0.092705
57	Neu3	0.028821	0.027812	0.060246	0.053327	0.835653	0.667419
58	Slc40a1	0.083922	0.095411	0.166625	0.28874	0.384726	0.179292
59	Il22	0.007771	0.008065	0.003604	0.008499	0.860607	0.008779
60	Hp	0.007771	0.008065	0.007638	0.013376	0.860607	0.047671
61	Hpx	0.007771	0.008065	0.003604	0.008595	0.860607	0.007156
62	Pcbp4	0.009495	0.012202	0.004643	0.010652	0.020129	0.003501
63	Pcbp3	0.012452	0.012558	0.006289	0.01225	0.961568	0.027975
64	Ireb2	0.200697	0.205773	0.137189	0.161649	0.721662	0.372345
65	Ndfip1	0.31997	0.296984	0.159203	0.292991	0.268846	0.069558
66	Glrx3	0.303586	0.295483	0.199801	0.284397	0.756802	0.12322
67	Cisd2	0.046779	0.041849	0.034236	0.03579	0.519249	0.70719
68	Slc25a37	0.184587	0.180537	0.716806	0.481279	0.769777	0.500716
69	Slc48a1	0.154751	0.122308	0.247154	0.231763	0.023006	0.795474
70	Asb11	0.007771	0.008065	0.00373	0.008499	0.860607	0.011532
71	Hfe2	0.007771	0.008065	0.003604	0.009815	0.860607	0.000626
72	Steap1	0.007771	0.008065	0.003604	0.008639	0.860607	0.00791
73	Tmprss6	0.007771	0.008065	0.003604	0.008561	0.860607	0.007936
74	Cybrd1	0.010012	0.01606	0.005803	0.011169	0.240113	0.116958
75	Il6	0.007771	0.008065	0.003604	0.008949	0.860607	0.003406
76	Tlr9	0.18901	0.175538	0.065271	0.162854	0.559203	0.091765
77	Hamp	0.007771	0.008065	0.003604	0.008499	0.860607	0.008779
78	Steap4	0.009093	0.009466	0.005369	0.009517	0.844773	0.086015
79	Aco2	0.281366	0.271247	0.275595	0.268562	0.587524	0.778817
80	Tlr3	0.015441	0.015644	0.007944	0.018626	0.946068	0.027149
81	Cisd1	0.068871	0.065689	0.064531	0.059389	0.651308	0.417664
82	Slc25a38	0.007771	0.008065	0.004564	0.008499	0.860607	0.051437
83	Slc25a28	0.090025	0.085501	0.051173	0.076466	0.605732	0.113797
84	Nox1	0.007771	0.008065	0.003605	0.008499	0.860607	0.008795
85	Fam132b	0.02599	0.026918	0.127975	0.10671	0.83357	0.76172
86	Bola2	0.921033	0.942639	0.696702	0.956523	0.764892	0.068752
87	Nox3	0.007771	0.008065	0.003604	0.008499	0.860607	0.008779
88	Slc11a2	0.027327	0.036439	0.039777	0.03899	0.159956	0.950754
89	Slc11a2	0.062631	0.060864	0.091422	0.059077	0.80646	0.126955
90	Iscu	0.844944	0.813611	0.853614	0.975764	0.703808	0.477372

## Sheet: qPCR_liver
Liver
	Gene name	Gene expression (2^(-ΔCt))				p-value			Supplemental Figure 3
		HRG1+/+ Standard	HRG1-/- Standard	HRG1+/+ 2ppm	HRG1-/- 2ppm	+/+ vs -/- Standard	+/+ vs -/- 2ppm
1	Ncoa4	2.10481	2.05461	1.8401	1.51978	0.842456	0.010102
2	Ankrd37	0.026956	0.029494	0.085682	0.074238	0.686342	0.526779
3	Smad7	0.045746	0.060019	0.042773	0.045979	0.088687	0.718038
4	Neo1	0.088618	0.085184	0.079316	0.084068	0.623462	0.697684
5	Mfsd7b	0.033904	0.0287	0.034737	0.029811	0.278941	0.486382
6	Steap3	0.282205	0.379398	0.259662	0.211577	0.086504	0.301235
7	Alas2	0.738493	0.827988	0.578526	0.659839	0.479046	0.605066
8	Steap2	0.049261	0.045718	0.079847	0.083476	0.590147	0.782351
9	Pcbp2	2.47216	2.66061	2.80595	2.29393	0.551858	0.040291
10	Slc39a8	0.47985	0.515413	0.442933	0.463886	0.568555	0.698327
11	Slc39a14	1.11389	1.28158	1.19621	1.24019	0.243892	0.749833
12	Hmox2	0.500969	0.557152	0.547028	0.518539	0.23307	0.525405
13	Slc11a2	0.266538	0.245697	0.402017	0.37846	0.51679	0.585676
14	Il12a	0.006174	0.006711	0.006229	0.005119	0.648028	0.155095
15	Heph	0.012257	0.012459	0.011403	0.010497	0.925382	0.65044
16	Fbxl5	0.330613	0.292015	0.326683	0.318606	0.306851	0.83004
17	Slc38a1	0.009863	0.009664	0.013854	0.012196	0.858419	0.58464
18	Cp	11.1842	11.291	9.24431	10.3981	0.91491	0.361235
19	Nox4	0.301777	0.369597	0.31618	0.232075	0.092537	0.254908
20	Trfr2	1.39756	1.48814	1.47202	1.30872	0.534117	0.257797
21	Tlr7	0.011021	0.013092	0.021151	0.024298	0.357052	0.576796
22	Alas1	2.4487	2.37184	3.16059	2.15509	0.937472	0.12928
23	Aco1	1.4741	1.46268	1.30262	1.19163	0.954875	0.612794
24	Bmp6	0.026047	0.031494	0.011476	0.009744	0.217314	0.512344
25	Epo	0.006174	0.006711	0.006229	0.005119	0.648028	0.155095
26	Fech	1.32734	1.40553	1.27237	1.25195	0.658019	0.908706
27	Fxn	0.358537	0.367927	0.352618	0.32621	0.776755	0.458308
28	Ifnab	0.017581	0.026947	0.014468	0.019398	0.213494	0.506078
29	Il1b	0.061586	0.069314	0.102627	0.061808	0.72544	0.139748
30	Lcn2	0.267921	0.128132	0.29268	0.464611	0.267906	0.5562
31	Smad4	0.772931	0.71437	0.779715	0.86016	0.512164	0.508856
32	Trim27	0.488392	0.486109	0.474558	0.432887	0.954172	0.297162
33	Saa1	4.42916	2.24588	2.85835	3.64767	0.406544	0.754409
34	Stat6	0.013739	0.014096	0.011708	0.011772	0.863464	0.968186
35	Epas1	1.1478	1.35118	1.68715	1.76804	0.217485	0.708785
36	Fth1	46.9709	48.5549	49.6934	40.8903	0.792539	0.181332
37	Ftl1	46.8915	42.2564	28.7884	32.3678	0.390758	0.393369
38	Gast	0.006174	0.006711	0.006229	0.005119	0.648028	0.155095
39	Ggh	0.285346	0.29256	0.323914	0.260677	0.83938	0.059112
40	Herc2	0.35564	0.382736	0.383258	0.344749	0.384618	0.262309
41	Hfe	0.561019	0.530981	0.488806	0.465035	0.683101	0.5818
42	Hif1a	0.246592	0.26424	0.241707	0.270835	0.50479	0.283897
43	Hmox1	0.104365	0.1158	0.192946	0.141604	0.592594	0.151771
44	Id1	0.060124	0.070904	0.070147	0.062814	0.265836	0.739887
45	Ifna2	0.009547	0.018035	0.010855	0.011244	0.010002	0.899766
46	Ifna4	0.006703	0.006711	0.006229	0.007456	0.994363	0.62851
47	Ifnb1	0.00675	0.009052	0.007154	0.00677	0.081153	0.678612
48	Il10	0.006174	0.006711	0.006229	0.005119	0.648028	0.155095
49	Il1a	0.085707	0.089735	0.081813	0.061604	0.788144	0.064725
50	Nos2	0.304159	0.436781	0.207065	0.229652	0.412871	0.89302
51	Spic	0.01849	0.015979	0.042308	0.041677	0.268166	0.957923
52	Stat3	1.16919	1.13451	1.08723	1.26985	0.823213	0.14194
53	Tfrc	0.238403	0.221555	0.775859	0.853378	0.672732	0.600141
54	Pcbp1	1.99715	1.98335	1.84455	1.87635	0.952889	0.902948
55	Eif2ak1	0.38162	0.400133	0.373302	0.38837	0.694657	0.742811
56	Slc11a1	0.028851	0.026178	0.054541	0.055204	0.627299	0.944282
57	Neu3	0.041021	0.032129	0.038816	0.043619	0.134109	0.576291
58	Slc40a1	0.968484	0.996529	0.999023	1.06535	0.854911	0.766943
59	Il22	0.006174	0.006711	0.006229	0.005119	0.648028	0.155095
60	Hp	35.0992	27.749	32.5043	39.6473	0.296094	0.440617
61	Hpx	69.9216	56.0308	57.4101	71.3855	0.17532	0.210616
62	Pcbp4	0.048157	0.06004	0.044817	0.050902	0.160598	0.454102
63	Pcbp3	0.009664	0.010573	0.009489	0.010926	0.543752	0.312287
64	Ireb2	0.827994	0.76695	0.717796	0.781823	0.51992	0.493991
65	Ndfip1	2.19014	2.23674	2.058	1.91744	0.866357	0.575084
66	Glrx3	1.13398	1.14116	1.23752	1.03203	0.952871	0.141758
67	Cisd2	0.09629	0.102094	0.107751	0.113297	0.725393	0.689943
68	Slc25a37	0.207294	0.225136	0.194363	0.198761	0.563322	0.896901
69	Slc48a1	0.510877	0.319351	0.438605	0.268671	0.004204	0.004492
70	Asb11	0.006174	0.006742	0.012435	0.008084	0.628657	0.524463
71	Hfe2	1.4122	1.49507	1.89378	1.43447	0.674471	0.083435
72	Steap1	0.006195	0.008248	0.007112	0.007579	0.107006	0.600925
73	Tmprss6	1.19931	1.21527	1.14121	1.14327	0.936316	0.992596
74	Cybrd1	0.007649	0.015536	0.009117	0.012143	0.010447	0.37467
75	Il6	0.006174	0.006711	0.006627	0.005119	0.648028	0.077788
76	Tlr9	0.006821	0.007646	0.007404	0.007786	0.441323	0.733958
77	Hamp	9.51596	19.4347	0.006229	0.009745	0.192934	0.116914
78	Steap4	0.984624	0.965356	0.826565	0.967361	0.942259	0.525285
79	Aco2	1.86685	2.08411	2.46302	1.97888	0.308786	0.316985
80	Tlr3	0.03356	0.038133	0.048575	0.037533	0.526121	0.075002
81	Cisd1	1.8356	2.21581	2.51588	1.82031	0.236467	0.059429
82	Slc25a38	0.023206	0.038059	0.026684	0.031214	0.070787	0.727451
83	Slc25a28	0.122955	0.14652	0.103535	0.112261	0.224229	0.46567
84	Nox1	0.006174	0.006711	0.006229	0.005119	0.648028	0.155095
85	Fam132b	0.022474	0.025306	0.026509	0.023461	0.386068	0.348758
86	Bola2	1.55202	1.82048	1.46517	1.28588	0.08256	0.119444
87	Nox3	0.006174	0.006711	0.006229	0.005119	0.648028	0.155095
88	Slc11a2	0.160049	0.185315	0.243143	0.302872	0.542801	0.240097
89	Slc11a2	0.044632	0.03938	0.062076	0.046701	0.475314	0.01464
90	Iscu	3.72562	4.23611	4.06652	2.92081	0.308763	0.004343

## Sheet: ICP
	Standard diet (WT vs KO)		2ppm diet (WT vs KO)		Metal	Figure 2/3
Organ	P value	95% CI	P value	95% CI	Fe	Figure 2/3
Spleen	<0.0001	860.0 to 1856	<0.0001	341.7 to 845.1	Fe	Figure 2/3
Liver	0.0283	4.588 to 75.21	0.174	-11.43 to 60.11	Fe	Figure 2/3
Kidney	0.2274	-83.36 to 20.83	0.0225	4.068 to 49.24	Fe	Figure 2/3
BM	0.0017	296.2 to 1029	<0.0001	1278 to 1914	Fe	Figure 2/3
Heart	0.0262	6.551 to 95.61	0.3383	-20.81 to 58.50	Fe	Figure 2/3
Brain	0.0117	-42.15 to -5.815	0.0133	-28.79 to -3.662	Fe	Figure 2/3
	Standard diet (WT vs KO)		2ppm diet (WT vs KO)			Figure 2/3
Organ	P value	95% CI	P value	95% CI	Heme	Figure 2/3
Spleen	<0.0001	19.91 to 35.29	<0.0001	34.11 to 45.23	Heme	Figure 2/3
Liver	0.4083	-0.1717 to 0.3964	0.4975	-0.3069 to 0.5903	Heme	Figure 2/3
Kidney	0.7761	-0.3400 to 0.2605	0.5105	-0.3405 to 0.1808	Heme	Figure 2/3
BM	0.0001	3.681 to 8.631	0.0005	4.494 to 12.98	Heme	Figure 2/3
Heart	0.7926	-0.08286 to 0.06455	0.0325	0.01103 to 0.2056	Heme	Figure 2/3
	Standard diet (WT vs KO)					Figure 2/3
Organ	P value	95% CI				Figure 2/3
Spleen	0.8771	-1.374 to 1.180			Cu	Figure 2/3
Liver	0.8504	-4.521 to 3.755			Cu	Figure 2/3
Kidney	0.9479	-5.461 to 5.121			Cu	Figure 2/3
BM	0.0068	-1.772 to -0.3431			Cu	Figure 2/3
Heart	0.0172	1.277 to 11.99			Cu	Figure 2/3
Brain	0.8337	-6.188 to 5.030			Cu	Figure 2/3
	Standard diet (WT vs KO)					Figure 2/3
Organ	P value	95% CI			Mn	Figure 2/3
Spleen	0.0271	0.03641 to 0.5490			Mn	Figure 2/3
Liver	0.9141	-0.8138 to 0.9049			Mn	Figure 2/3
Kidney	0.7807	-1.136 to 1.496			Mn	Figure 2/3
BM	0.3429	-0.1041 to 0.2799			Mn	Figure 2/3
Heart	0.0904	-0.06899 to 0.8863			Mn	Figure 2/3
Brain	0.1287	-0.8079 to 0.1084			Mn	Figure 2/3
	Standard diet (WT vs KO)					Figure 2/3
Organ	P value	95% CI			Zn	Figure 2/3
Spleen	0.961	-19.50 to 20.46			Zn	Figure 2/3
Liver	0.861	-11.43 to 13.58			Zn	Figure 2/3
Kidney	0.1091	-3.476 to 32.49			Zn	Figure 2/3
BM	0.6916	-9.108 to 13.35			Zn	Figure 2/3
Heart	0.0209	2.607 to 29.18			Zn	Figure 2/3
Brain	0.1917	-28.49 to 6.001			Zn	Figure 2/3

## Sheet: 59Fe
	Significant?	P value	Mean1	Mean2	Difference	SE of difference	t ratio	df	Time	Figure 5B
Blood(per ml)	No	0.988051	13.6	13.66	-0.064	4.157	0.0154	9	24h	Figure 5B
Spleen	No	0.168689	4.486	8.133	-3.647	2.437	1.497	9	24h	Figure 5B
Liver	No	0.749092	17.02	18.36	-1.343	4.071	0.3298	9	24h	Figure 5B
Kidney	No	0.221943	4.466	2.018	2.447	1.865	1.312	9	24h	Figure 5B
Blood(per ml)	No	0.153101	33.77	24.36	9.409	5.961	1.579	8	96h	Figure 5B
Spleen	Yes	0.0100446	1.613	10.87	-9.254	2.76	3.352	8	96h	Figure 5B
Liver	No	0.219065	13.64	16.21	-2.577	1.933	1.334	8	96h	Figure 5B
Kidney	No	0.0689954	5.764	3.091	2.672	1.273	2.099	8	96h	Figure 5B
